# Supplementary material
Source: HighWire-hosted journal article supplement (https://bmjopen.bmj.com/content/10/8/e039692)
Supplement: inline-supplementary-material-1 [file inline-supplementary-material-1.pdf]

Semi-structured interview guide for 'There were some clues': A qualitative study of heuristics used by parents of adolescents to make credibility judgments of online health news articles citing research by Maggio et al

Now that you have read the news article, I have a few follow-up questions.

**DO NEXT** -- After reading a news story like this, what would you do next?

If not mentioned, ask:

Is there a chance that you might share a news article like this?

*If yes,*

- What about the news story would prompt you to share it?
- How would you share it and why?
- Who might you share it with and why?

*If no,*

- Why would you not share it?

**DESCRIBE** - How would you describe the information you read in this news article to a family member or friend who is also a parent?

[Encourage the participant to scroll through the article]

- Can you point out any sections of the article that you would want to highlight?
- What is it about that information that you would want to highlight?

**RELEVANCE** - How would you describe the relevance of this article to you and your family?

**LEARN MORE** – What, if anything, in this news article might make you want to learn more about this health topic?

- What about that made you want to learn more?
- Where do you tend to look for more information?
- *As needed:* What types of information would you look for?
- *As needed, if a web search: A search can bring back a lot of hits. How do you decide which ones to look at? Can you tell me what makes for a good search result?*

**PURPOSE** - How would you describe the purpose of this article?

- In what ways, if any, does the purpose of this article impact your impression of the article?

**TRUST** – How would you describe your trust in the news story?

[Encourage the participant to scroll through the article]

- Can you scroll through the article with me and point out sections that impacted your trust in the story and tell me why?
  - *If participant mentions statistics, numbers, percentages, etc. ask:*

- You mentioned the statistics/percentages/numbers. Can you tell me more about how they play into your trust of the news story?
  - What do the statistics/percentages/numbers tell you about the news story?
- I mentioned that this is from a newspaper. In what ways, if any, does that factor into your trust of the information?

**JOURNALIST** - This story was written by a journalist for a national newspaper. How do you think the journalist put together this news story?

**INTERACTED** - Did you click any links in the news story?

If no,

**DID NOT CLICK** – Can you tell me why you did not click the links?

*Ask participant to scroll to the journal link.*

If you had clicked on a link like this, where do you think it would have taken you?

Please click on the link (*link to scientific article*).

- How would you describe what you see on this website?
- How do you think the information on this website relates to the news story?
- Does the information on this website change how you would trust the news story? Why or why not?
- What do you think is the value, if any, of the news story author, linking to this website?
- Do you typically click links in news stories? Why or why not?

**CLICKED** – Why did you click the links?

Please click on the link(s) you clicked.

- Can you describe what you found on this website?
- How do you think the information on this website relates to the news story?
- Did the information on this website change how trusted the news story? Why or why not?
- What do you think is the value, if any, of the news story author, linking to this website?

Do you typically click links in news stories? Why or why not?

*\*If clicked link above was not a journal article, Ask participant to scroll to the journal link.*

If you had clicked on a link like this, where do you think it would have taken you?

*Please click on the link (link to scientific article).*

- How would you describe what you see on this website?
- How do you think the information on this website relates to the news story?
- Does the information on this website change how you would trust the news story? Why or why not?
- What do you think is the value, if any, of the news story author, linking to this website?
- Do you typically click links in news stories? Why or why not?

**OVERALL IMPRESSION** – Now that you have reviewed this article and some of its related information, how would you describe your overall impression of the article?

**WHAT ELSE** -- Is there anything else that you would like to share with me about the news story or anything we have talked about today?
